# Supplementary material for: Relationship between dynamic fatigue crack propagation properties and viscoelasticity of natural rubber/silicone rubber composites
Source: Royal Society of Chemistry journal article supplement (doi:10.1039/c9ra05833h), 2019-01-01
Supplement: c9ra05833h1.pdf [file c9ra05833h1.pdf]

# Supporting information

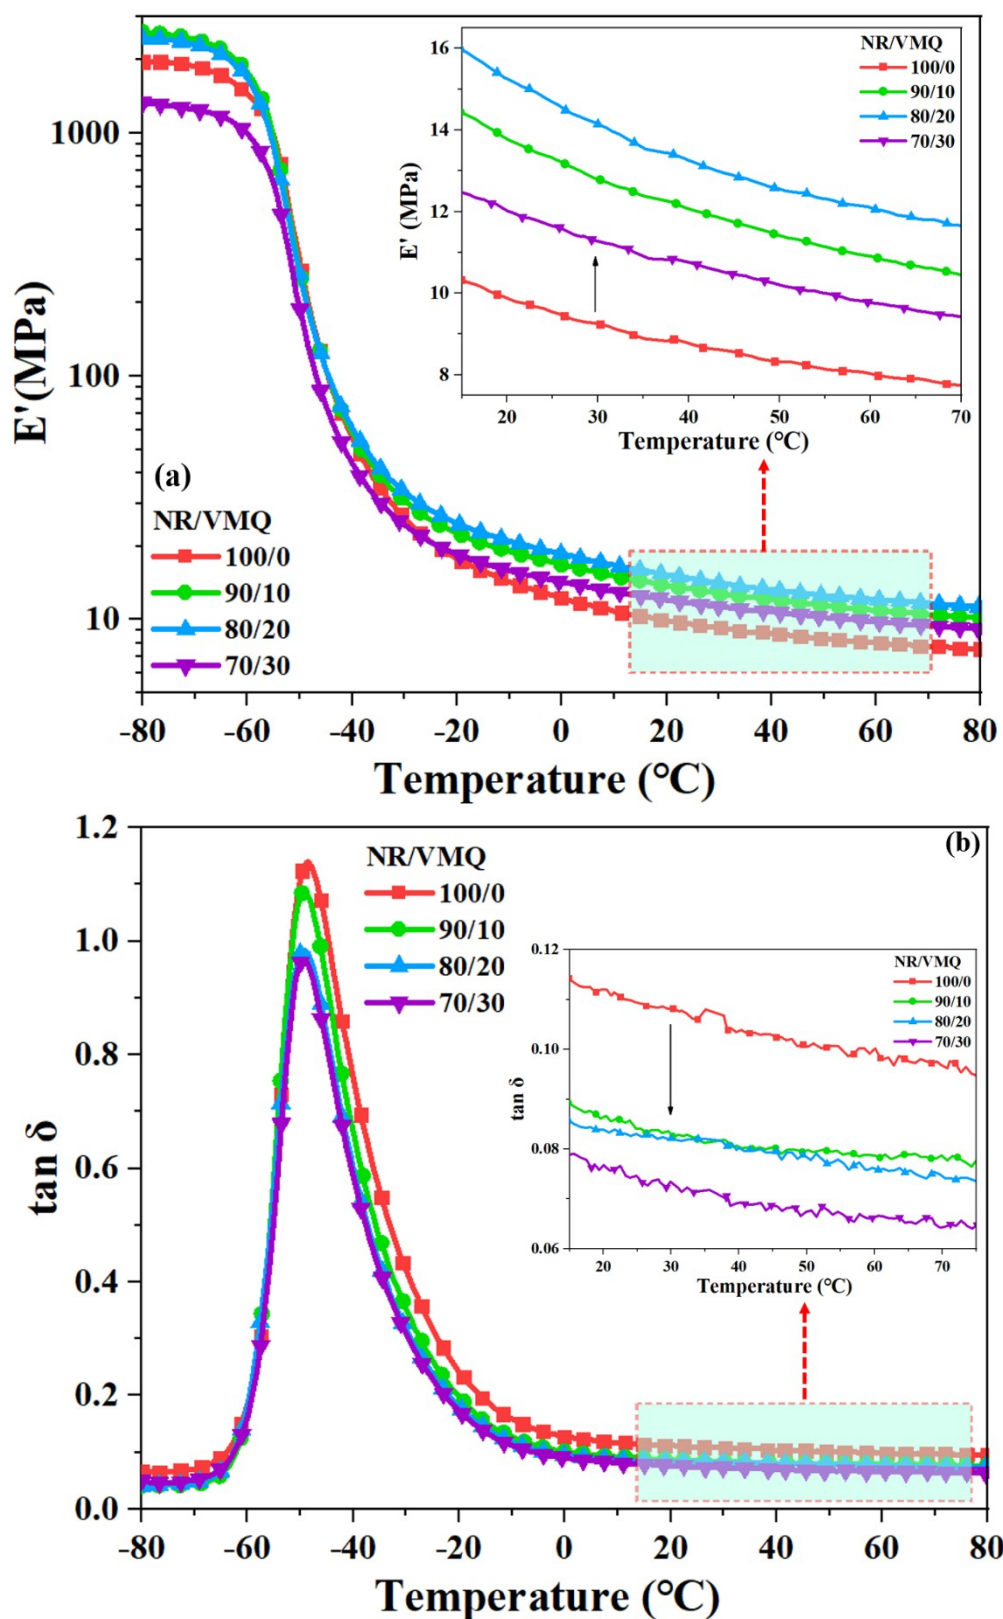

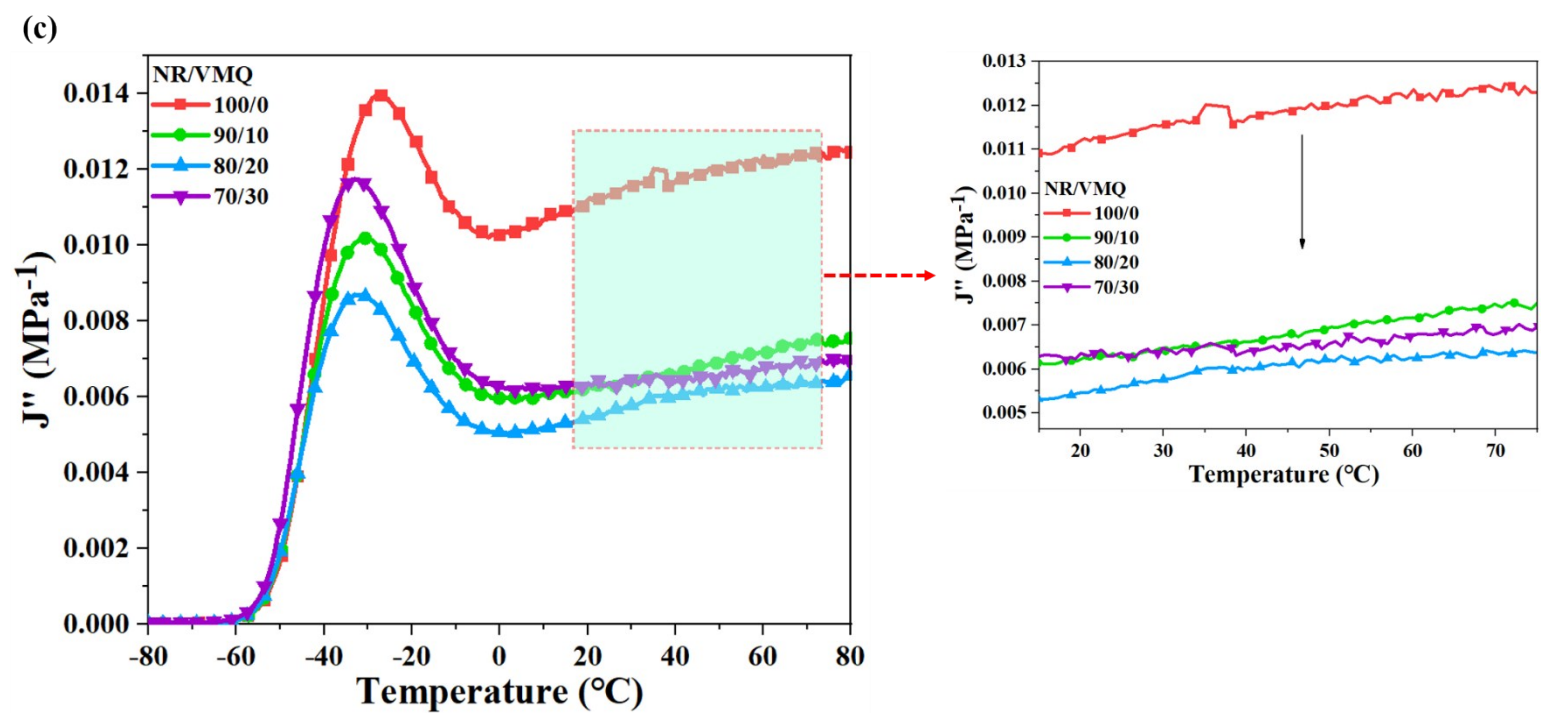

**Fig. S1** Temperature dependency of viscoelastic parameters of NR/VMQ composites by DMTA: **(a)** Storage modulus  $E'$ , **(b)** Loss factor  $\tan \delta$ , **(c)** Loss compliance modulus  $J''$
